# Supplementary material for: Porphyrin photosensitizer molecules as effective medicine candidates for photodynamic therapy: electronic structure information aided design
Source: Royal Society of Chemistry journal article supplement (doi:10.1039/d4ra05585c), 2024-01-01
Supplement: d4ra05585c1.pdf [file d4ra05585c1.pdf]

## Supporting Information

**Table S1** The  $S_1$ - $T_1$  gap value of M-Porphyrin and M-Porphyrin-PDI.

|                                     | $\Delta E_{ST} / \text{eV}$ |
|-------------------------------------|-----------------------------|
| <b>Porphyrin</b>                    | 0.85                        |
| <b>Fe<sup>1</sup>-Porphyrin</b>     | 3.34                        |
| <b>Fe<sup>2</sup>-Porphyrin</b>     | 1.13                        |
| <b>Zn-Porphyrin</b>                 | 0.74                        |
| <b>Mg-Porphyrin</b>                 | 0.71                        |
| <b>PDI</b>                          | 1.14                        |
| <b>Porphyrin-PDI</b>                | 0.71                        |
| <b>Fe<sup>1</sup>-Porphyrin-PDI</b> | 3.54                        |
| <b>Fe<sup>2</sup>-Porphyrin-PDI</b> | 0.67                        |
| <b>Zn-Porphyrin-PDI</b>             | 0.73                        |
| <b>Mg-Porphyrin-PDI</b>             | 0.70                        |

**Table S2** The  $S_1$ - $T_1$  gap value of Compound 1-5

|                   | $\Delta E_{ST} / \text{eV}$ |
|-------------------|-----------------------------|
| <b>Compound 1</b> | 0.25                        |
| <b>Compound 2</b> | 0.34                        |
| <b>Compound 3</b> | 0.73                        |
| <b>Compound 4</b> | 0.31                        |
| <b>Compound 5</b> | 0.31                        |
